# Supplementary material for: An MHV-68 Mutator Phenotype Mutant Virus, Confirmed by CRISPR/Cas9-Mediated Gene Editing of the Viral DNA Polymerase Gene, Shows Reduced Viral Fitness
Source: MDPI journal article supplement (doi:10.3390/v13060985), 2021-05-26

## Supplementary information

**Table S1. Primers used for PCR amplification and Sanger sequencing of the viral PK, TK, and DP.** The viral PK and TK were PCR amplified using two amplicons (underlined, PK F9-R1162 and F727-R1491; TK F7-R1152 and F770-R1905). The viral DP was amplified using three amplicons (underlined, F12-R1179, F996-R2155 and F1969-R3259). All primers were subsequently used for Sanger sequencing.

|           | Start nucleotide | Forward primer                | Start nucleotide | Reverse primer                |
|-----------|------------------|-------------------------------|------------------|-------------------------------|
| <b>PK</b> | 9                | <u>TGTTAACACAGTATCCGCTGCT</u> | 636              | CCATCAATTAACCCCTCTGAAGC       |
|           | 501              | ATGGTGCGTCCAATAAGGTT          | 1162             | <u>CAACAGACAAGCCCCAGACT</u>   |
|           | 727              | <u>GGCAGGAGGACTTTCAGACA</u>   | 1491             | <u>GGGGTGATCTTATAAATGCAGA</u> |
| <b>TK</b> | 7                | <u>CCTGGAACCTACTGGGTGTG</u>   | 658              | AGTCATCATCAGGCGTTTCC          |
|           | 494              | GGAAATGGCAGGTTCTCCAC          | 1152             | <u>CATGTTCCATCGGAGACCTT</u>   |
|           | 770              | <u>GGAAGAGCATCGGTCAGTTG</u>   | 1382             | TGCAGGTACGTGTGGTTGAT          |
|           | 1756             | TCACAGACCCGGCTATTAAA          | 1905             | <u>ATGCACCAACCACACCATC</u>    |
| <b>DP</b> | 12               | <u>TGTTGTGCTCTCTTTTGTGAG</u>  | 929              | GGAGAGCTCTGGATGATGACA         |
|           | 12               | ACTTCTATGCCAAGGCTCCA          | 1179             | <u>CGCTGTCCCTCATGAAAATTA</u>  |
|           | 996              | <u>GTGAATGTGGGTTTCCCTGT</u>   | 1664             | CATCAGTCAGCACCCGTCT           |
|           | 1476             | GCCTGAACATGGAAAAGGAA          | 2155             | <u>CAGAGGCCACTCCTGTGAAG</u>   |
|           | 1969             | <u>TAGCGGCACTGTTCACTTTG</u>   | 2649             | CAGCTTCCCCCAGTTACTCA          |
|           | 2538             | AGGGTGTGGATCTTGTGAGG          | 3259             | <u>CCAGAGTGGTGTATCCATTCC</u>  |

**Table S2. The inhibitory effects of a range of antivirals on the replication of MHV-68 wild type and drug-resistant viruses in Vero cells.** MHV-68 wild-type and drug-resistant viral clones were characterized phenotypically by cytopathic effect (CPE) reduction assays. For each compound, the 50% effective concentration (EC<sub>50</sub>), i.e. compound concentration required to reduce virus-induced CPE by 50%, was calculated. For each viral mutant, minimum 3 independent phenotypic assays were performed, and the mean EC<sub>50</sub> values were calculated.

| 2A                          |                             |              |                                 |               |               |                  |                                 |               |             |                        |
|-----------------------------|-----------------------------|--------------|---------------------------------|---------------|---------------|------------------|---------------------------------|---------------|-------------|------------------------|
| MHV-68 genotype             | EC <sub>50</sub> (μM)       |              |                                 |               |               |                  |                                 |               |             |                        |
|                             | Purine nucleoside analogues |              | Pyrimidine nucleoside analogues |               |               |                  | Acyclic nucleoside phosphonates |               |             | Pyrophosphate analogue |
|                             | ACV                         | GCV          | BVDU                            | HDVD          | KAH-39-139    | KAY-2-41         | CDV                             | HPMP-5azaC    | HPMPO-DAPy  | PFA                    |
| MHV-68 wild-type            | 4.54 ± 1.66                 | 9.58 ± 1.34  | 1.93 ± 0.64                     | 0.65 ± 0.21   | 1.91 ± 0.64   | 53.02 ± 11.81    | 2.62 ± 0.55                     | 1.74 ± 0.51   | 0.36 ± 0.07 | 301.67 ± 34.58         |
| Y383S <sup>GCV</sup>        | 5.16 ± 1.57                 | 42.91 ± 9.47 | 1.79 ± 0.78                     | 1.59 ± 0.49   | ≤ 0.18 ± 0.05 | > 183.6.1 ± 0.00 | 23.39 ± 8.85                    | 9.47 ± 2.98   | 7.73 ± 2.57 | 1027.16 ± 408.39       |
| Q827R <sup>HPMP-5azaC</sup> | 3.50 ± 1.10                 | 37.20 ± 8.68 | 2.17 ± 1.07                     | ≤ 0.51 ± 0.26 | 2.62 ± 1.18   | > 183.61 ± 0.00  | ≥ 106.14 ± 47.21                | 96.93 ± 25.20 | 8.44 ± 2.45 | 120.34 ± 27.01         |
| G302W <sup>PFA</sup>        | 4.25 ± 0.24                 | 39.08 ± 1.90 | 2.22 ± 0.84                     | 1.86 ± 0.52   | 10.09 ± 1.91  | 83.92 ± 25.70    | 14.23 ± 3.22                    | 3.82 ± 2.01   | 3.13 ± 2.12 | 633.85 ± 44.32         |
| K442T <sup>PFA</sup>        | 8.39 ± 0.72                 | 20.07 ± 3.90 | 1.39 ± 0.31                     | ≤ 0.83 ± 0.26 | 2.27 ± 1.14   | 28.34 ± 9.44     | 7.19 ± 1.57                     | 3.76 ± 2.21   | 0.74 ± 0.39 | 632.94 ± 44.51         |
| G302W+K442T <sup>PFA</sup>  | 3.54 ± 1.04                 | 28.40 ± 1.08 | 1.67 ± 1.01                     | 1.54 ± 1.14   | 1.19 ± 0.25   | ≥ 147.26 ± 34.41 | 6.47 ± 0.34                     | 3.48 ± 0.69   | 2.41 ± 0.75 | 783.78 ± 124.05        |

| 2B                                  |                             |               |                                 |               |               |                  |                                 |               |               |                        |
|-------------------------------------|-----------------------------|---------------|---------------------------------|---------------|---------------|------------------|---------------------------------|---------------|---------------|------------------------|
| MHV-68 genotype                     | EC <sub>50</sub> (μM)       |               |                                 |               |               |                  |                                 |               |               |                        |
|                                     | Purine nucleoside analogues |               | Pyrimidine nucleoside analogues |               |               |                  | Acyclic nucleoside phosphonates |               |               | Pyrophosphate analogue |
|                                     | ACV                         | GCV           | BVDU                            | HDVD          | KAH-39-139    | KAY-2-41         | CDV                             | HPMP-5azaC    | HPMPO-DAPy    | PFA                    |
| C297W clone 1 <sup>HPMPO-DAPy</sup> | 2.43 ± 0.79                 | 28.14 ± 10.25 | 2.94 ± 1.74                     | 3.28 ± 2.56   | ≤ 0.20 ± 0.09 | ≥ 123.95 ± 55.35 | 53.25 ± 21.54                   | 30.44 ± 15.49 | 20.40 ± 12.53 | > 396.83 ± 0.00        |
| C297W clone 2 <sup>HPMPO-DAPy</sup> | 2.65 ± 1.70                 | 25.13 ± 11.65 | 0.32 ± 0.07                     | 0.75 ± 0.49   | < 0.15 ± 0.00 | 56.38 ± 45.10    | 61.00 ± 26.73                   | 17.56 ± 5.93  | 24.04 ± 11.74 | > 396.83 ± 0.00        |
| C981Y clone 1 <sup>CDV</sup>        | 1.09 ± 0.17                 | 7.79 ± 2.32   | 0.33 ± 0.14                     | < 0.21 ± 0.00 | < 0.15 ± 0.00 | 47.22 ± 33.45    | 28.08 ± 12.61                   | 16.15 ± 4.50  | 3.12 ± 1.09   | 35.68 ± 17.09          |
| C981Y clone 2 <sup>CDV</sup>        | 2.57 ± 0.30                 | 12.14 ± 2.08  | 0.57 ± 0.21                     | ≤ 0.29 ± 0.13 | ≤ 0.21 ± 0.10 | 36.07 ± 10.95    | 11.91 ± 3.58                    | 4.59 ± 0.47   | 2.44 ± 0.47   | 44.53 ± 8.92           |

**Table S3. Spontaneous mutations appearing in the viral PK, TK, or DP of different viral clones of C297W and C981Y that led to the hypothesis that amino acid changes C297W and C981Y are associated with a mutator phenotype virus.** Viral clones C297W and C981Y were isolated through limited dilution. **(A)** Sanger sequencing of 6 clones of C297W demonstrated various mutations in the viral PK, TK, or DP. **(B)** The mutator virus phenotype of C981Y was determined using NGS and demonstrated various mutations in the viral DP of 2 viral clones.

**A**

| <b>C297W</b> | <b>MHV-68<br/>Δ nucleotide</b>                                                                                                                        | <b>MHV-68<br/>Δ amino acid</b>                                                                                                                                             |
|--------------|-------------------------------------------------------------------------------------------------------------------------------------------------------|----------------------------------------------------------------------------------------------------------------------------------------------------------------------------|
| PK           | A133G<br>G432A<br>G643A<br>G1018A<br>A1024G                                                                                                           | M45V<br>M144I<br>D215N<br>A340T<br>M342V                                                                                                                                   |
| TK           | G632T<br>T636G<br>G1135A<br>A1401G<br>G1519T<br>G1546A<br>G1551A<br>C1560G<br>C1568A<br>C1900A<br>T1920C                                              | R211M<br>S212A<br>V379I<br>K467 (silent)<br>V507L<br>E516K<br>L517(silent)<br>I520 (silent)<br>P523H<br>L634I<br>G640(silent)                                              |
| DP           | C544A<br>A565T<br>C568T<br>C579A<br>C849A<br>G935A<br>T891G<br>C1010T<br>T1088C<br>C1418A<br>G1968A<br>A1993G<br>C2350A<br>T2450C<br>G2582T<br>A2970C | H182N<br>I189F<br>P190S<br>T193(silent)<br>S283(silent)<br>C312Y<br>C297W<br>T337I<br>M363T<br>P473Q<br>Q656 (silent)<br>T665A<br>L784I<br>L817P<br>R861M<br>T990 (silent) |

**B**

| <b>C981Y</b> | <b>MHV-68<br/>Δ nucleotide</b>                                                                | <b>MHV-68<br/>Δ amino acid</b>                                                                                               |
|--------------|-----------------------------------------------------------------------------------------------|------------------------------------------------------------------------------------------------------------------------------|
| DP           | T159C<br>T291C<br>G904T<br>C1014T<br>A1336G<br>A1522G<br>A2110G<br>A2410G<br>T2836C<br>G2942A | L53 (silent)<br>H97 (silent)<br>G302W (PFA-resistant)<br>C338 (silent)<br>S446G<br>I508V<br>T704A<br>T804A<br>S946P<br>C981Y |

**Table S4: Relative fitness (RF) of MHV-68 wild-type (WT) and drug-resistant clones (A) or mutator phenotype viruses (B) in growth competition assays in the absence and presence of antiviral drugs.**

Vero cells were infected with 750 PFU/well of MHV-68 wild-type, a drug-resistant viral clone or a 50:50 ratio of both viruses. After 2 h incubation, residual virus was removed and fresh medium with or without antivirals was added to the cell cultures. The following antivirals were used: 9  $\mu$ M ACV, 8  $\mu$ M GCV, 1.50  $\mu$ M BVDU, 0.20  $\mu$ M HDVD, 1.60  $\mu$ M CDV or 160  $\mu$ M PFA. The day of infection (day 0) and after 5 days of growth, an aliquot of each viral inoculum was used for DNA extraction to determine viral variants frequency by NGS and using this data the relative fitness was calculated. An RF value of 1 represents equivalent levels of viral fitness between the competitors; a value of <1 signifies less growth of the mutant viral variant than that of the wild-type virus; a value >1 indicates a more efficient grown of the mutant viral variant than that of the wild-type virus. The data shown represent the mean RF-values from two biological replicates. <sup>b</sup>*P* values were determined using one-way Anova [multiple comparisons compared to MHV-68 wild-type with Dunnett test ( $P \leq 0.01$ )].

| <b>A</b>                                                       |                  |                                                |                                   |                                              |
|----------------------------------------------------------------|------------------|------------------------------------------------|-----------------------------------|----------------------------------------------|
| <b>Competition condition and genotype of competing viruses</b> | <b>Antiviral</b> | <b>Relative fitness (RF) value<sup>a</sup></b> | <b><i>P</i> value<sup>b</sup></b> | <b>Fitness interpretation (mutant vs WT)</b> |
| WT vs WT                                                       |                  | 1.00 ( $\pm 0.0000$ )                          |                                   | =                                            |
| Y383S <sup>GCV</sup> vs WT                                     | None             | 1.33 $\pm$ 0.013                               | 0.0090                            | >                                            |
|                                                                | ACV              | 1.58 $\pm$ 0.0003                              | 0.0002                            | >                                            |
|                                                                | GCV              | 1.89 $\pm$ 0.0014                              | <0.0001                           | >                                            |
|                                                                | BVDU             | 1.15 $\pm$ 0.083                               | 0.2647                            | =                                            |
|                                                                | HDVD             | 1.44 $\pm$ 0.078                               | 0.0016                            | >                                            |
|                                                                | CDV              | 1.67 $\pm$ 0.14                                | 0.0001                            | >                                            |
|                                                                | PFA              | 1.56 $\pm$ 0.099                               | 0.0003                            | >                                            |
| 80:20 Y383S <sup>GCV</sup> vs WT                               | None             | 1.33 $\pm$ 0.041                               | <0.0001                           | >                                            |
|                                                                | ACV              | 1.49 $\pm$ 0.0011                              | <0.0001                           | >                                            |
|                                                                | GCV              | 1.65 $\pm$ 0.028                               | <0.0001                           | >                                            |
|                                                                | BVDU             | 1.07 $\pm$ 0.013                               | 0.1680                            | =                                            |
|                                                                | HDVD             | 1.44 $\pm$ 0.0052                              | <0.0001                           | >                                            |
|                                                                | CDV              | 1.45 $\pm$ 0.068                               | <0.0001                           | >                                            |
|                                                                | PFA              | 1.52 $\pm$ 0.0042                              | <0.0001                           | >                                            |
| Q827R <sup>HPMP-5azaC</sup> vs WT                              | None             | 1.08 $\pm$ 0.017                               | 0.2155                            | =                                            |
|                                                                | ACV              | 0.89 $\pm$ 0.011                               | 0.063                             | =                                            |
|                                                                | GCV              | 1.42 $\pm$ 0.047                               | <0.0001                           | >                                            |
|                                                                | BVDU             | 1.02 $\pm$ 0.0002                              | 0.9976                            | =                                            |
|                                                                | HDVD             | 0.99 $\pm$ 0.026                               | 0.9996                            | =                                            |
|                                                                | CDV              | 1.30 $\pm$ 0.055                               | 0.0001                            | >                                            |
|                                                                | HPMP-5azaC       | 1.47 $\pm$ 0.055                               | <0.0001                           | >                                            |
|                                                                | PFA              | 0.75 $\pm$ 0.041                               | 0.0003                            | <                                            |
| G302W <sup>PFA</sup> vs WT                                     | None             | 0.98 $\pm$ 0.013                               | 0.2405                            | =                                            |
|                                                                | ACV              | 0.84 $\pm$ 0.006                               | <0.0001                           | <                                            |
|                                                                | GCV              | 1.19 $\pm$ 0.0012                              | <0.0001                           | >                                            |
|                                                                | BVDU             | 0.98 $\pm$ 0.0069                              | 0.3628                            | =                                            |
|                                                                | HDVD             | 1.05 $\pm$ 0.014                               | 0.0024                            | >                                            |
|                                                                | CDV              | 1.12 $\pm$ 0.0060                              | <0.0001                           | >                                            |

|                                  |      |                   |         |   |
|----------------------------------|------|-------------------|---------|---|
|                                  | PFA  | $1.04 \pm 0.0095$ | 0.0062  | > |
| K442T <sup>PFA</sup> vs WT       | None | $1.02 \pm 0.012$  | 0.8177  | = |
|                                  | ACV  | $1.33 \pm 0.011$  | <0.0001 | > |
|                                  | GCV  | $1.29 \pm 0.012$  | <0.0001 | > |
|                                  | BVDU | $1.08 \pm 0.012$  | 0.0311  | = |
|                                  | HDVD | $1.15 \pm 0.033$  | 0.0006  | > |
|                                  | CDV  | $1.25 \pm 0.0008$ | <0.0001 | > |
|                                  | PFA  | $1.10 \pm 0.0152$ | 0.0081  | > |
| G302W+K442T <sup>PFA</sup> vs WT | None | $0.97 \pm 0.020$  | 0.4780  | = |
|                                  | ACV  | $0.92 \pm 0.0099$ | 0.004   | < |
|                                  | GCV  | $1.27 \pm 0.035$  | <0.0001 | > |
|                                  | BVDU | $0.93 \pm 0.012$  | 0.0156  | = |
|                                  | HDVD | $1.08 \pm 0.0060$ | 0.0063  | > |
|                                  | CDV  | $1.15 \pm 0.0086$ | <0.0001 | > |
|                                  | PFA  | $1.16 \pm 0.0097$ | <0.0001 | > |

| <b>B</b>                                                |           |                                          |                      |                                       |
|---------------------------------------------------------|-----------|------------------------------------------|----------------------|---------------------------------------|
| Competition condition and genotype of competing viruses | Antiviral | Relative fitness (RF) value <sup>a</sup> | P value <sup>b</sup> | Fitness interpretation (mutant vs WT) |
| WT vs WT                                                |           | 1.00 ( $\pm 0.0000$ )                    |                      | =                                     |
| C297W clone 1 <sup>HPMPO-DAPY</sup> vs WT               | None      | $0.58 \pm 0.0030$                        | <0.0001              | <                                     |
|                                                         | ACV       | $0.64 \pm 0.0062$                        | <0.0001              | <                                     |
|                                                         | GCV       | $0.66 \pm 0.013$                         | <0.0001              | <                                     |
|                                                         | BVDU      | $0.54 \pm 0.0040$                        | <0.0001              | <                                     |
|                                                         | HDVD      | $0.63 \pm 0.0029$                        | <0.0001              | <                                     |
|                                                         | CDV       | $0.61 \pm 0.016$                         | <0.0001              | <                                     |
|                                                         | PFA       | $0.63 \pm 0.0040$                        | <0.0001              | <                                     |
| C297W clone 2 <sup>HPMPO-DAPY</sup> vs WT               | None      | $0.47 \pm 0.0053$                        | <0.0001              | <                                     |
|                                                         | ACV       | $0.54 \pm 0.011$                         | <0.0001              | <                                     |
|                                                         | GCV       | $0.52 \pm 0.0065$                        | <0.0001              | <                                     |
|                                                         | BVDU      | $0.40 \pm 0.0078$                        | <0.0001              | <                                     |
|                                                         | HDVD      | $0.47 \pm 0.0022$                        | <0.0001              | <                                     |
|                                                         | CDV       | $0.49 \pm 0.0022$                        | <0.0001              | <                                     |
|                                                         | PFA       | $0.50 \pm 0.020$                         | <0.0001              | <                                     |
| C981Y clone 1 <sup>CDV</sup> vs WT                      | None      | $0.60 \pm 0.012$                         | <0.0001              | <                                     |
|                                                         | ACV       | $0.55 \pm 0.0019$                        | <0.0001              | <                                     |
|                                                         | GCV       | $0.66 \pm 0.014$                         | <0.0001              | <                                     |
|                                                         | BVDU      | $0.50 \pm 0.013$                         | <0.0001              | <                                     |
|                                                         | HDVD      | $0.54 \pm 0.011$                         | <0.0001              | <                                     |
|                                                         | CDV       | $0.63 \pm 0.011$                         | <0.0001              | <                                     |
|                                                         | PFA       | $0.47 \pm 0.022$                         | <0.0001              | <                                     |
| C981Y clone 2 <sup>CDV</sup> vs WT                      | None      | $0.67 \pm 0.0086$                        | <0.0001              | <                                     |
|                                                         | ACV       | $0.68 \pm 0.019$                         | <0.0001              | <                                     |
|                                                         | GCV       | $0.74 \pm 0.014$                         | <0.0001              | <                                     |
|                                                         | BVDU      | $0.64 \pm 0.0051$                        | <0.0001              | <                                     |
|                                                         | HDVD      | $0.59 \pm 0.013$                         | <0.0001              | <                                     |
|                                                         | CDV       | $0.72 \pm 0.0013$                        | <0.0001              | <                                     |
|                                                         | PFA       | $0.61 \pm 0.0095$                        | <0.0001              | <                                     |

**Table S5. Alignment of C297W spontaneous mutations with HSV-1, HSV-2, VZV and CMV in the viral PK, TK, and DP in the mutation frequency experiment.** Known polymorphisms are marked in yellow polymorphisms, known mutations are marked in red and conserved positions are underlined in italic.

|    | MHV-68<br>Δ nucleotide | MHV-68<br>Δ amino acid | Corresponding position in |             |             |             |
|----|------------------------|------------------------|---------------------------|-------------|-------------|-------------|
|    |                        |                        | HSV-1                     | HSV-2       | VZV         | CMV         |
| PK | A133G                  | M45V                   | -                         | -           | -           | S306        |
|    | <u>A332C</u>           | <u>K111T</u>           | -                         | -           | -           | <u>K359</u> |
|    | T344C                  | L115P                  | -                         | -           | -           | -           |
|    | C459A                  | I153 (silent)          | -                         | -           | -           | T409        |
|    | A del 468              | P156fs                 | -                         | -           | -           | R412        |
|    | A630C                  | A210 (silent)          | -                         | -           | -           | V466        |
|    | T ins 769              | F257fs                 | -                         | -           | -           | V498        |
|    | C776T                  | A259V                  | -                         | -           | -           | Q500        |
|    | G1018A                 | A340T                  | -                         | -           | -           | R593        |
|    | A1104G                 | G368 (silent)          | -                         | -           | -           | G623        |
|    | G1209A                 | R403 (silent)          | -                         | -           | -           | S657        |
|    | G1246A                 | V416M                  | -                         | -           | -           | E670        |
|    | C1281A                 | C427*                  | -                         | -           | -           | S676        |
| TK | G157T                  | E53*                   | -                         | -           | -           | -           |
|    | C389A                  | S130Y                  | -                         | -           | -           | -           |
|    | C414A                  | I138 (silent)          | -                         | -           | -           | -           |
|    | C489A                  | P163 (silent)          | -                         | -           | -           | -           |
|    | C646T                  | Q216*                  | -                         | -           | -           | -           |
|    | C1162T                 | H388Y                  | S113                      | S114        | S78         | -           |
|    | <u>T1206C</u>          | <u>P402 (silent)</u>   | <u>P131</u>               | <u>P132</u> | <u>P96</u>  | -           |
|    | A1354G                 | R452G                  | T183                      | T184        | S150        | -           |
|    | C1396T                 | Q466*                  | T197                      | T198        | E164        | -           |
|    | A1436G                 | K479R                  | D211                      | A212        | P178        | -           |
|    | A1447T                 | T483S                  | D215                      | D216        | S182        | -           |
|    | <u>T ins 1532</u>      | <u>I511 FS</u>         | <u>L242</u>               | <u>L243</u> | <u>L209</u> | -           |
|    | G1546A                 | E516K                  | G260                      | G261        | N226        | -           |
|    | C1568A                 | P523H                  | V267                      | A268        | D233        | -           |
|    | <u>A1676G</u>          | <u>D559G</u>           | <u>D286</u>               | <u>D287</u> | <u>D255</u> | -           |
|    | G1699A                 | E567K                  | -                         | -           | -           | -           |
|    | <u>C1730T</u>          | <u>S577L</u>           | <u>A299</u>               | <u>A300</u> | <u>G268</u> | -           |
|    | <u>T1797C</u>          | <u>D599 (silent)</u>   | <u>D328</u>               | <u>D329</u> | <u>S297</u> | -           |
| DP | C27T                   | R9 (silent)            | A50                       | A51         | T13         | S58         |
|    | <u>C97T</u>            | <u>L33 (silent)</u>    | <u>I77</u>                | <u>I78</u>  | <u>L46</u>  | <u>I44</u>  |
|    | T159C                  | L53 (silent)           | R101                      | R102        | R70         | R64         |
|    | G244A                  | A82T                   | V133                      | A134        | I102        | -           |
|    | C248T                  | S83L                   | D134                      | D135        | D103        | -           |
|    | <u>C380A</u>           | <u>T127N</u>           | <u>T180</u>               | <u>T181</u> | <u>T145</u> | <u>N132</u> |
|    | <u>G382A</u>           | <u>V128I</u>           | <u>V181</u>               | <u>V182</u> | <u>V146</u> | <u>V133</u> |
|    | <u>T383C</u>           | <u>V128A</u>           | <u>V181</u>               | <u>V182</u> | <u>V146</u> | <u>V133</u> |
|    | <u>G414A</u>           | <u>G138 (silent)</u>   | <u>G191</u>               | <u>G192</u> | <u>G156</u> | <u>G143</u> |
|    | A ins 443              | Q148fs                 | T201                      | T202        | I166        | Q153        |
|    | T479C                  | L160P                  | D213                      | D214        | D178        | D165        |
|    | G del 530              | R177 fs                | -                         | -           | -           | R182        |
|    | A565T                  | I189F                  | T256                      | A257        | T237        | T195        |
|    | C568T                  | P190S                  | D257                      | D258        | D238        | S196        |
|    | <u>T657C</u>           | <u>L219 (silent)</u>   | <u>F286</u>               | <u>F287</u> | <u>F267</u> | <u>L226</u> |
|    | G701A                  | C234Y                  | T300                      | T301        | T281        | L241        |
|    | A748G                  | T250A                  | R317                      | R318        | Q298        | S257        |
|    | <u>T891G</u>           | <u>C297W</u>           | <u>C371</u>               | <u>C372</u> | <u>C352</u> | <u>C304</u> |
|    | <u>G930T</u>           | <u>Q310H</u>           | <u>E388</u>               | <u>E389</u> | <u>E369</u> | <u>D318</u> |
|    | <u>C1010T</u>          | <u>T337I</u>           | <u>S416</u>               | <u>S417</u> | <u>S397</u> | <u>T369</u> |
|    | T1208A                 | V403D                  | N494                      | N495        | N475        | P436        |
|    | A1272C                 | Q424H                  | R512                      | R513        | R493        | A473        |
|    | <u>A1293C</u>          | <u>G431 (silent)</u>   | <u>G519</u>               | <u>G520</u> | <u>G500</u> | <u>G480</u> |
|    | <u>C1418A</u>          | <u>P473Q</u>           | <u>P561</u>               | <u>P562</u> | <u>P542</u> | <u>P522</u> |
|    | <u>A1698G</u>          | <u>I566M</u>           | <u>L702</u>               | <u>L707</u> | <u>F667</u> | <u>F702</u> |
|    | T1733C                 | L578P                  | V714                      | V719        | V679        | A714        |
|    | T ins 1857             | T619fs                 | E754                      | E759        | T718        | S752        |
|    | A1930G                 | T644A                  | R779                      | R784        | K743        | N778        |

|               |               |              |              |              |              |
|---------------|---------------|--------------|--------------|--------------|--------------|
| G1968A        | Q656 (silent) | R791         | R796         | R755         | C790         |
| A1997C        | K666T         | A800         | A805         | A764         | R800         |
| <u>T2090C</u> | <u>L697P</u>  | <u>L831</u>  | <u>L836</u>  | <u>L795</u>  | <u>L831</u>  |
| <u>T2230C</u> | <u>Y744H</u>  | <u>Y884</u>  | <u>Y889</u>  | <u>Y849</u>  | <u>Y905</u>  |
| <u>C2350A</u> | <u>L784I</u>  | <u>L924</u>  | <u>L929</u>  | <u>L889</u>  | <u>L948</u>  |
| C2 del 350    | L784 fs       | L924         | L929         | L889         | L948         |
| A2494G        | N832D         | A972         | A977         | 937K         | D997         |
| T2700C        | P900 (silent) | H1040        | H1045        | P1005        | D1065        |
| <i>A2761G</i> | <i>R921G</i>  | <i>R1061</i> | <i>R1066</i> | <i>R1026</i> | <i>R1086</i> |
| <i>C2777A</i> | <i>P926H</i>  | <i>P1066</i> | <i>P1071</i> | <i>P1031</i> | <i>P1091</i> |
| <i>T2795C</i> | <i>I932T</i>  | <i>I1072</i> | <i>I1077</i> | <i>I1037</i> | <i>V1097</i> |
| G2882T        | R961I         | A1155        | P1160        | S1096        | P1183        |
| A2970C        | T990 (silent) | T1184        | T1189        | R1125        | R1212        |
| C2997T        | N999 (silent) | -            | -            | -            | -            |
| <u>C3031T</u> | <u>L1011F</u> | <u>V1202</u> | <u>V1207</u> | <u>M1243</u> | <u>F1231</u> |

---

**Table S6. Alignment of C981Y spontaneous mutations with HSV-1, HSV-2, VZV and CMV in the viral PK, TK, and DP in the mutation frequency experiment.** Known polymorphisms are marked in yellow polymorphisms, known mutations are marked in red and conserved positions are underlined in italic.

|    | MHV-68<br>Δ nucleotide | MHV-68<br>Δ amino acid | Corresponding position in |              |              |              |
|----|------------------------|------------------------|---------------------------|--------------|--------------|--------------|
|    |                        |                        | HSV-1                     | HSV-2        | VZV          | CMV          |
| PK | A123T                  | K41N                   | -                         | -            | -            | F293         |
|    | <u>C197A</u>           | <u>S66*</u>            | -                         | -            | -            | <u>D319</u>  |
|    | <u>G626A</u>           | <u>G209E</u>           | -                         | -            | -            | <u>D465</u>  |
|    | T707C                  | I236T                  | -                         | -            | -            | Y487         |
|    | <u>G1002A</u>          | <u>R334 (silent)</u>   | -                         | -            | -            | <u>H587</u>  |
| TK | G72A                   | A24 (silent)           | -                         | -            | -            | -            |
|    | T267C                  | S89 (silent)           | -                         | -            | -            | -            |
|    | A794G                  | K265R                  | Q8                        | Q8           | -            | -            |
|    | A1401T                 | K467N                  | L198                      | <u>A199</u>  | P165         | -            |
|    | G1590A                 | M530I                  | -                         | -            | -            | -            |
| DP | G207A                  | Q69 (silent)           | V117                      | V118         | F86          | L77          |
|    | A565T                  | I189F                  | <u>T256</u>               | A257         | T237         | T195         |
|    | T726A                  | N242                   | G309                      | G310         | G290         | R249         |
|    | <u>C828A</u>           | <u>I276 (silent)</u>   | <u>L350</u>               | <u>L351</u>  | <u>L331</u>  | <u>L283</u>  |
|    | <u>C1014T</u>          | <u>C338 (silent)</u>   | <u>C417</u>               | <u>C418</u>  | <u>C398</u>  | <u>C370</u>  |
|    | A1336G                 | S446G                  | K534                      | K535         | K515         | <u>N495</u>  |
|    | A1522G                 | I508V                  | L596                      | L597         | L577         | Y557         |
|    | <u>T1556C</u>          | <u>I519T</u>           | <u>I607</u>               | <u>I608</u>  | <u>I588</u>  | <u>I568</u>  |
|    | C1691A                 | T564K                  | <u>K700</u>               | R705         | <u>R665</u>  | <u>T700</u>  |
|    | A2410G                 | T804A                  | V944                      | V949         | V909         | K968         |
|    | A del 2410             | T804 fs                | V944                      | V949         | V909         | K968         |
|    | <u>T2448C</u>          | <u>D816 (silent)</u>   | <u>D956</u>               | <u>D961</u>  | <u>D921</u>  | <u>D981</u>  |
|    | <u>T2778G</u>          | <u>P926 (silent)</u>   | <u>P1066</u>              | <u>P1071</u> | <u>P1031</u> | <u>P1091</u> |
|    | G2942A                 | C981Y                  | A1175                     | A1180        | A1116        | P1203        |



**Table S7. Alignment of C297W<sup>Crispr</sup> spontaneous mutations with HSV-1, HSV-2, VZV and CMV in the viral PK, TK, and DP. Known polymorphisms are marked in yellow polymorphisms, known mutations are marked in red and conserved positions are underlined in italic.**

|    | MHV-68<br>Δ nucleotide | MHV-68<br>Δ amino acid | Corresponding position in |             |             |             |
|----|------------------------|------------------------|---------------------------|-------------|-------------|-------------|
|    |                        |                        | HSV-1                     | HSV-2       | VZV         | CMV         |
| PK | C62A                   | S21Y                   | -                         | -           | -           | C274        |
|    | G408A                  | A136 (silent)          | -                         | -           | -           | V392        |
|    | A706G                  | I236M                  | -                         | -           | -           | Y488        |
|    | T ins 769              | F257fs                 | -                         | -           | -           | V498        |
|    | G822T                  | K274N                  | -                         | -           | -           | <b>R524</b> |
|    | T843C                  | A281 (silent)          | -                         | -           | -           | L531        |
|    | T904C                  | C302R                  | -                         | -           | -           | A555        |
| TK | A120G                  | G40 (silent)           | -                         | -           | -           | -           |
|    | G476T                  | R159L                  | -                         | -           | -           | -           |
|    | C869T                  | T290M                  | H22                       | P22         | -           | -           |
|    | C1053T                 | H351 (silent)          | D76                       | D77         | N41         | -           |
|    | A1741G                 | T581A                  | D303                      | D304        | N272        | -           |
| DP | C214T                  | Q72*                   | G120                      | E121        | D80         | S89         |
|    | <u>G382A</u>           | <u>V128I</u>           | <u>V181</u>               | <u>V182</u> | <u>V133</u> | <u>V146</u> |
|    | <u>T383C</u>           | <u>V128A</u>           | <u>V181</u>               | <u>V182</u> | <u>V133</u> | <u>V146</u> |
|    | <u>T1766C</u>          | <u>I589</u>            | <u>I725</u>               | <u>I730</u> | <u>I725</u> | <u>I690</u> |
|    | G2165C                 | S722T                  | W856                      | W861        | F856        | W820        |
|    | <u>G2379A</u>          | <u>L793 (silent)</u>   | <u>L933</u>               | <u>L938</u> | <u>L957</u> | <u>L898</u> |
|    | G2821T                 | E941*                  | R1081                     | R1086       | V1106       | D1046       |

[illegible]

**(II). Donor asymmetric templates designed and used for generation of the C297W MHV-68 recombinant viruses.** The asymmetric templates carry the nucleotide change corresponding to MHV-68 T891G mutation. For the generation of MHV-68 C297W recombinant viruses, we first designed the donor asymmetric template depicted in **(A)**. Three out of 44 screened MHV-68 viral clones showed the silent change in the PAM sequence, but not the desired edited single-base substitution, indicating that the Cas9 nuclease did cut the DNA duplex and HDR occurred but recombination events occurred without including the target base change. Then, a new asymmetric template was designed with the PAM sequence within a shorter distance from the base-pair substitution relative to Cas9 cut site **(B)**, which resulted in the generation of 3 viral clones bearing C297W substitution.

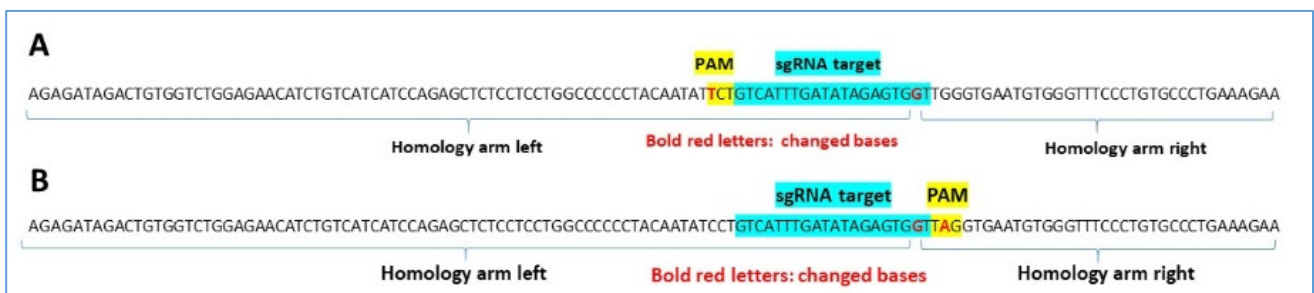

10

Transfection efficiency was assessed (detection of OFP by immunofluorescence and flow cytometry). After 24h, the cells were infected with MHV-68 for 2h, followed by removal of the viral inoculum and incubation with fresh medium. Cell culture supernatants were harvested and viral clones were isolated by plaque assay in Vero cells. **C) Screening of viral clones and selection of clones with the desired mutations** - Individual viral clones were collected and screened for the desired mutation by Sanger sequencing. Viral stocks were prepared in Vero cells for characterization of the recombinant viruses.

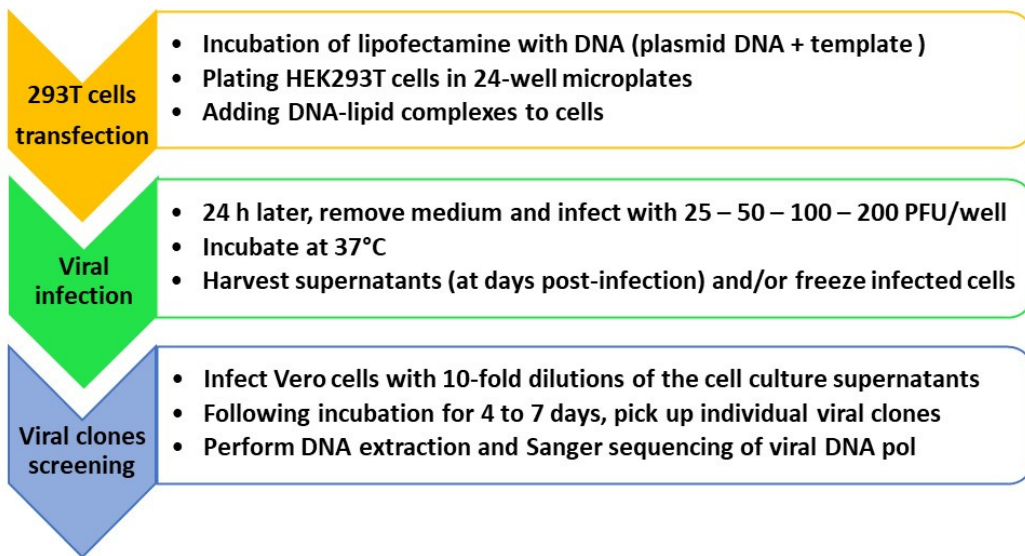

Supplement: s1 [file s1]
